# Correction for: LncRNA AK045171 protects the heart from cardiac hypertrophy by regulating the SP1/MG53 signalling pathway

Li Xu<sup>1</sup>, Hongjiang Wang<sup>1</sup>, Feng Jiang<sup>1</sup>, Hao Sun<sup>1</sup>, Dapeng Zhang<sup>1</sup>

<sup>1</sup>Heart Center and Beijing Key Laboratory of Hypertension, Beijing Chaoyang Hospital, Capital Medical University, Beijing 100020, China

Correspondence to: Li Xu; email: [imxuli@hotmail.com](mailto:imxuli@hotmail.com)

Original article: *Aging (Albany NY)* 2020; 12: 3126-3139

PMID: 32087602

PMCID: PMC7066930

doi: [10.18632/aging.102668](https://doi.org/10.18632/aging.102668)

**This article has been corrected:** The authors requested the replacement of Figure 5.

Figure 1A - HE staining – was placed in Figure 5C by mistake. The authors revised Figure 5.

This correction does not change the content of the publication and do not affect the conclusion of this research. The corrected Figure 5 is provided below.

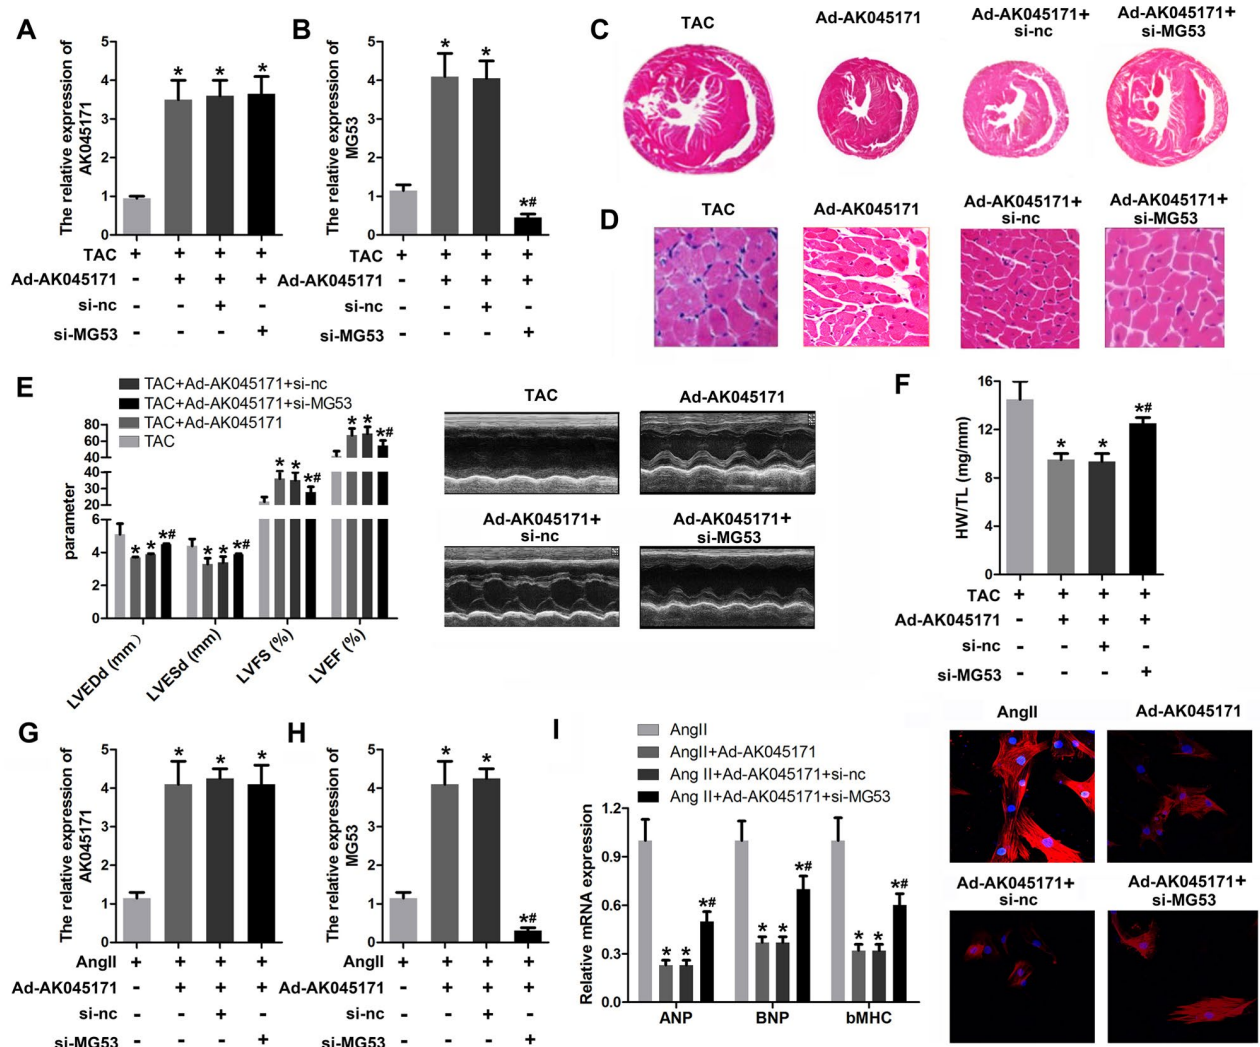

Figure 5. MG53 knockdown reversed the effect of AK045171 on cardiac hypertrophy. (C) HE staining.
